# Supplementary material for: Emissions of CFCs, HCFCs and HFCs from India
Source: Copernicus journal article supplement (doi:10.5194/acp-2018-1146), 2019-01-09
Supplement: Supplementary file 1 [file acp-2018-1146-supplement.pdf]

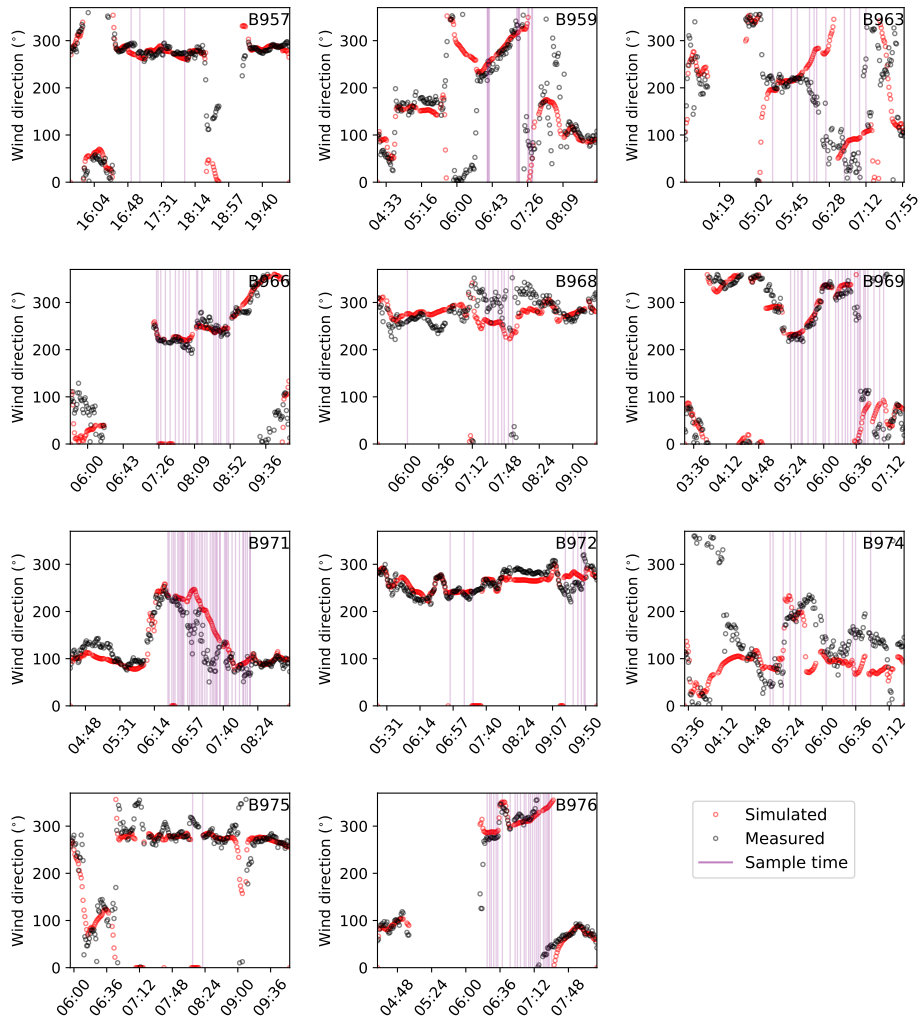

**Figure S1.** Comparison of wind direction ( $^{\circ}$ ), as measured from the research aircraft (black circles) with those simulated by the NAME model (red circles), for each flight on a minute by minute basis. The points in time at which samples were collected are indicated by vertical purple lines.

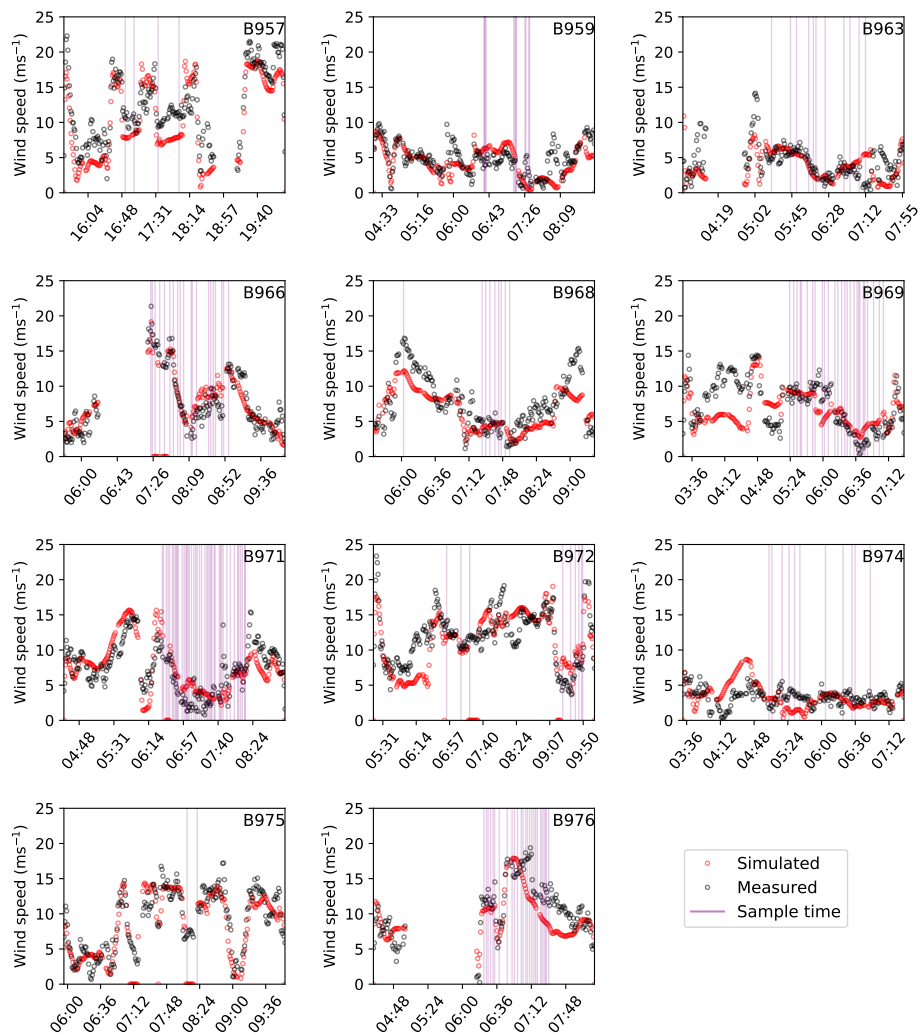

**Figure S2.** Comparison of wind speed ( $\text{m s}^{-1}$ ), as measured from the research aircraft (black circles) with those simulated by the NAME model (red circles), for each flight on a minute by minute basis. The points in time at which samples were collected are indicated by vertical purple lines.

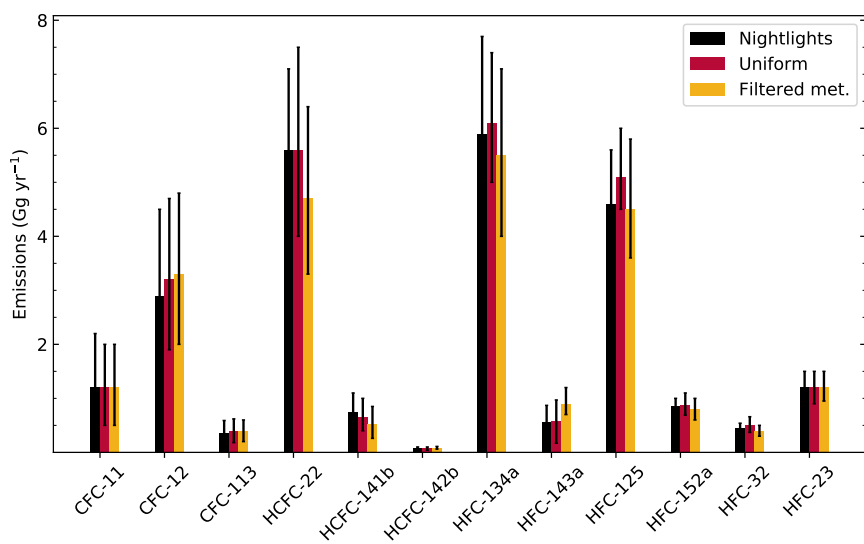

**Figure S3.** Comparison of posterior NCI ODS/HFC emissions estimates. Black bars) based on prior emissions distributed using the NOAA night lights distribution; red bars) based on prior emissions distributed using uniformly across the model domain; yellow bars) based on the NOAA night lights distribution, with observations for which the corresponding model simulated wind speed/direction differed from the observed value by  $\geq 20\%$  removed. Error bars represent the 5<sup>th</sup> – 95<sup>th</sup> percentiles of the posterior PDF.
